# Supplementary material
Source: PubMed Central journal article supplement (PMC4194149)
Supplement: NIHMS625209-supplement.pdf [file NIHMS625209-supplement.pdf]

## **Supplemental Information**

### **Leptin and IL-6 Family Cytokines Synergize to Stimulate Müller Glia Reprogramming and Retina Regeneration**

Xiao-Feng Zhao, Jin Wan, Curtis Powell, Rajesh Ramachandran, Martin G. Myers Jr and Daniel Goldman

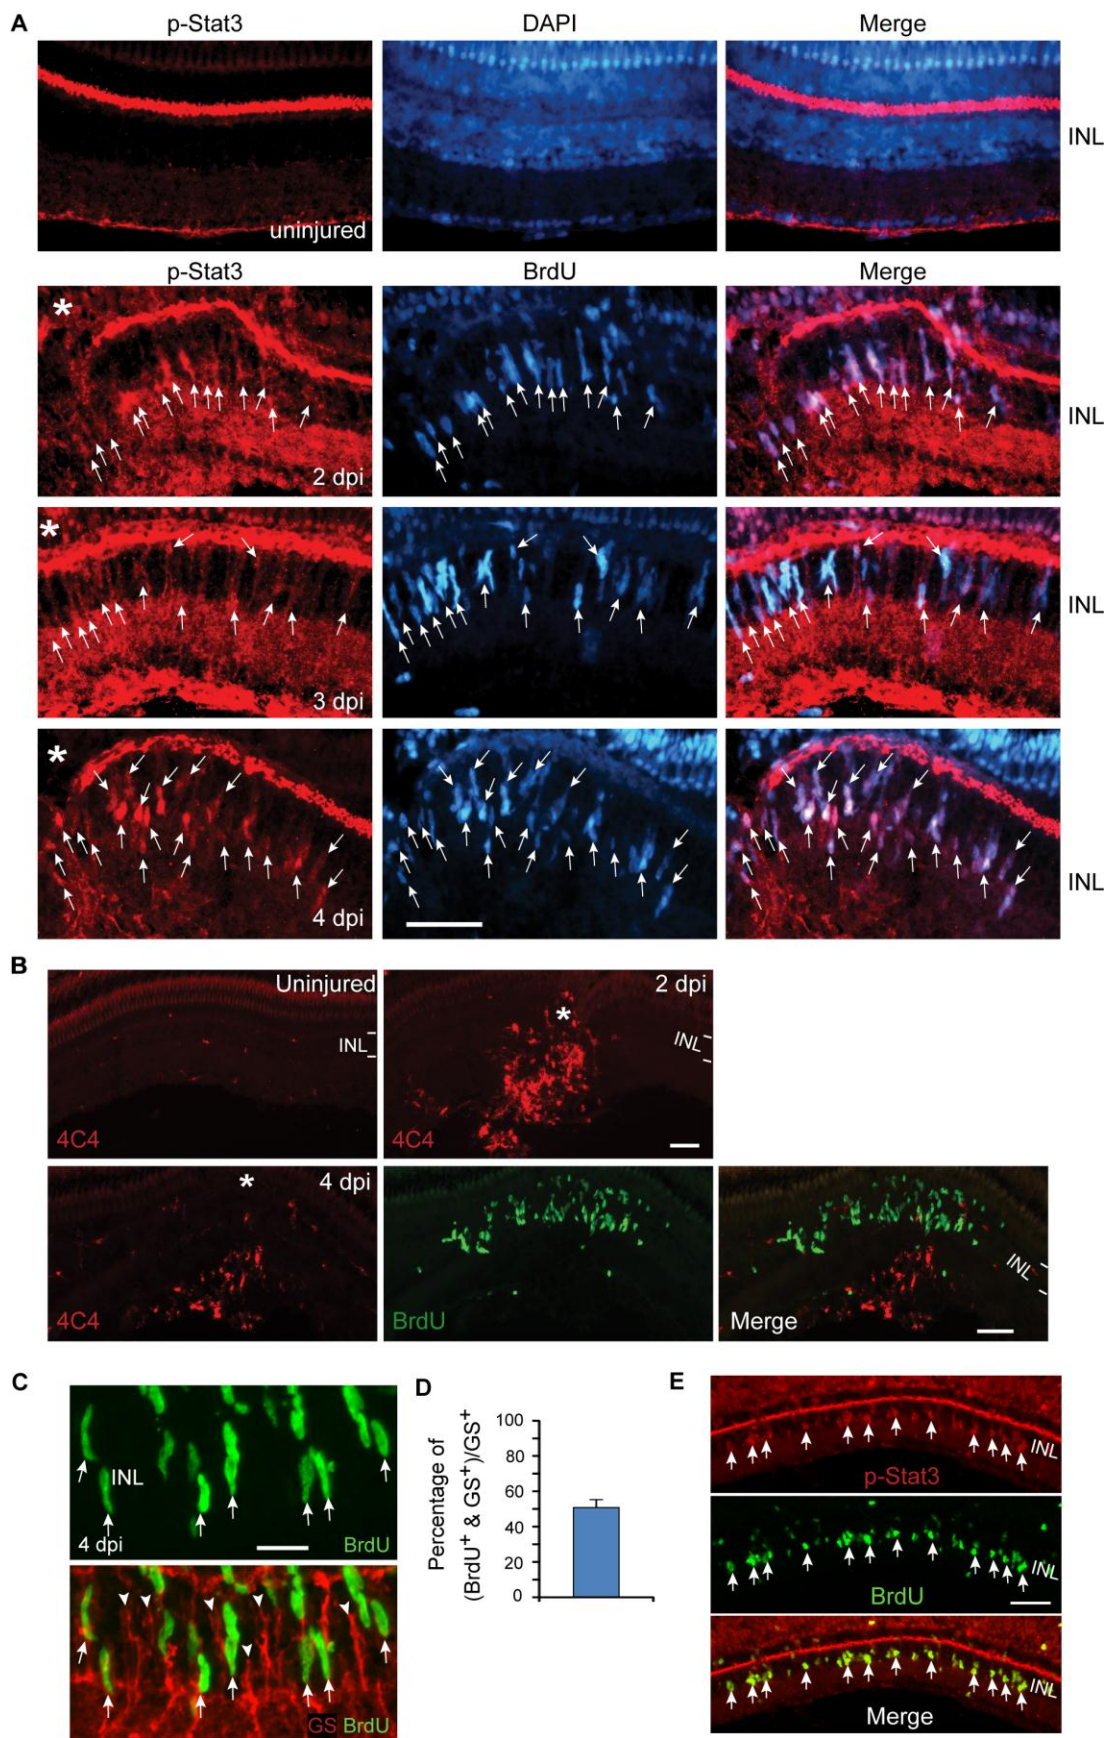

**Figure S1. Injury-dependent activation of the Jak/Stat3 signaling pathway. Related to**

**Figure 1.** (A) p-Stat3 (red) and BrdU (blue) immunofluorescence shows p-Stat3 is induced in BrdU<sup>+</sup> MG-derived progenitors at the injury site at 2-4 dpi; n=3. Arrows point to p-Stat3<sup>+</sup>/BrdU<sup>+</sup> double labelled cells. (B) 4C4 immunofluorescence (red) shows microglia, diffusely scattered throughout the uninjured retina, accumulate at the injury site, but do not proliferate (lack BrdU co-labeling, green). The BrdU<sup>+</sup> cells (green) are MG-derived progenitors confined to the INL. (C, D) Immunofluorescence shows ~50% of glutamine synthetase (GS)<sup>+</sup> MG (red) incorporate BrdU<sup>+</sup> 4 days after a 30 min exposure to UV light; n=3. Arrows point to BrdU<sup>+</sup>/GS<sup>+</sup> double labelled cells. Arrowheads point to BrdU/GS<sup>+</sup> quiescent MG. (E) Immunofluorescence shows p-Stat3 is restricted to BrdU<sup>+</sup> MG-derived progenitors 4 days after a 30 min exposure to UV light. Asterisks in (A) point to the injury site (needle poke). Scale bar, 20  $\mu$ m (C); 50  $\mu$ m (A,E). INL, inner nuclear layer.

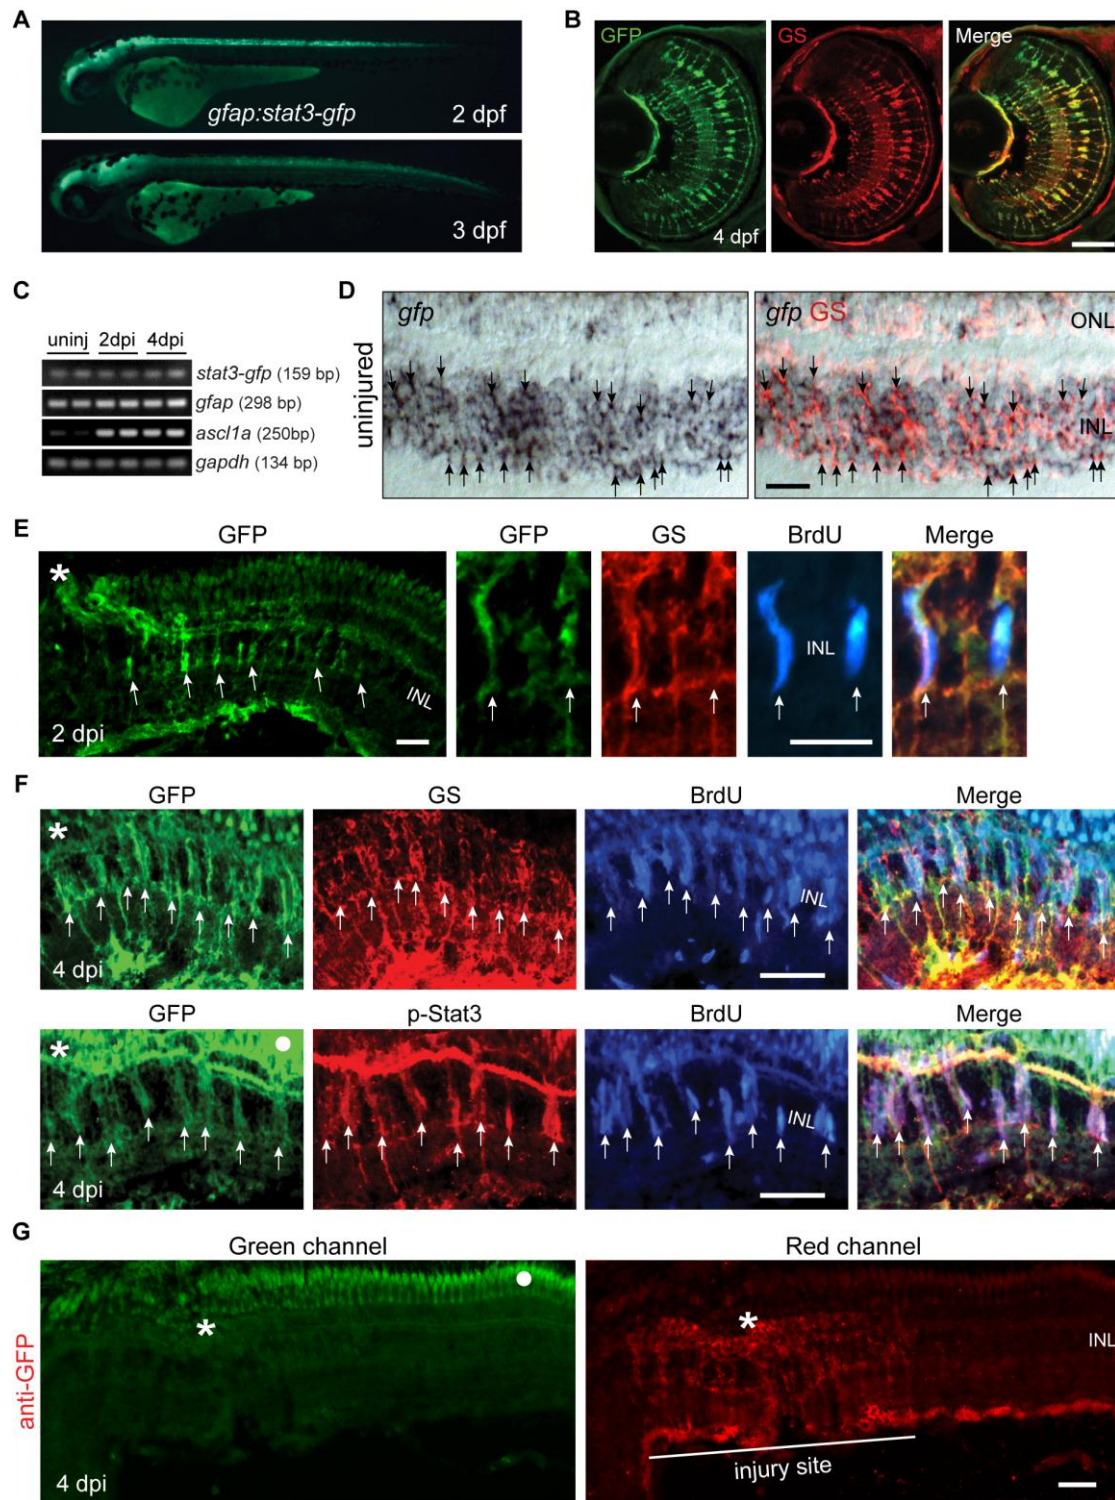

**Figure S2. Stat3-GFP expression in developing and adult *gfap:stat3-gfp* fish. Related to Figure 1.** (A) Stat3-GFP is expressed throughout brain and spinal cord in live *gfap:stat3-gfp* larva at 2 and 3 dpf. (B) Immunofluorescence on retinal sections shows co-localization of Stat3-GFP with glutamine synthetase (GS)<sup>+</sup> MG at 4 dpf. (C) Whole retina RT-PCR showing constitutive *gfap* mRNA expression in the uninjured and injured adult retina, while *ascl1a* mRNA was induced after retinal injury. (D) *In situ* hybridization and immunofluorescence shows expression of *gfap* RNA in GS<sup>+</sup> MG in adult uninjured retina

(arrows). (E) Immunofluorescence shows Stat3-GFP expression co-localizes with  $GS^+/BrdU^+$  MG-derived progenitors localized to the injury site at 2 dpi in the adult retina. (F) Immunofluorescence shows co-localization of Stat3-GFP with  $GS^+/p-Stat3^+/BrdU^+$  MG-derived progenitors at 4 dpi in the adult retina. White dot indicates autofluorescence unique to the green channel. Asterisks mark the injury site (needle poke) and arrows point to MG-derived progenitors. (G) Anti-GFP immunofluorescence on a retinal section prepared at 4 dpi from *gfap:stat3-gfp* fish using a secondary antibody coupled to a red fluor shows autofluorescence in the ONL when viewed in the green channel (left-hand panel, dot marks autofluorescence) that is not evident in the red channel (right-hand panel). Asterisk marks the injury site. Scale bar, 50  $\mu m$  (B, D-G). INL, inner nuclear layer; dpf, days post fertilization.

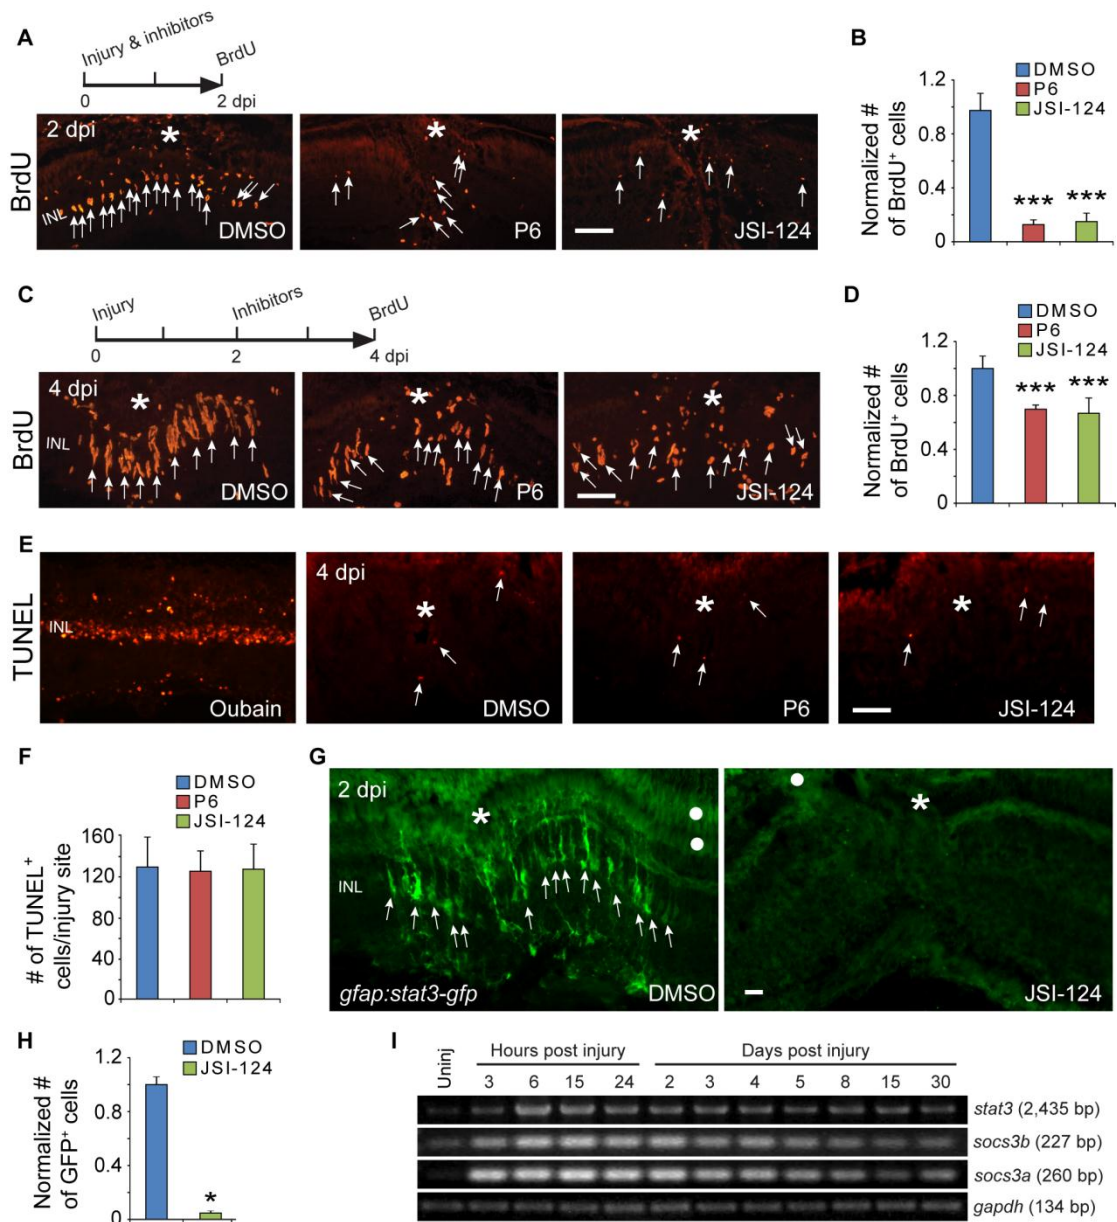

**Figure S3. Jak/Stat signaling regulates proliferation of MG-derived progenitors and Stat3-GFP expression. Related to Figure 2.** (A, B) BrdU immunofluorescence on retinal sections shows that exposing fish to Jak inhibitors P6 or JSI-124 from 0-2 dpi, inhibits progenitor proliferation at 2 dpi; \*\*\*P<0.001, n=4. (C, D) BrdU immunofluorescence shows that exposing fish to Jak inhibitors P6 or JSI-124 from 2-4 dpi, inhibits progenitor proliferation at 4 dpi; \*\*\*P<0.001, n=4. (E, F) TUNEL staining for apoptotic cells at 4 dpi in retinas treated with DMSO, P6 or JSI-124. Oubain was used as a positive control. In panel F, n=3. (G, H) GFP immunofluorescence shows that exposing *gfap:stat3-gfp* fish to Jak inhibitors JSI-124 from 0-2 dpi, inhibits Stat3-GFP expression; \*P<0.05, n=3. (I) RT-PCR analysis of retinal *stat3* and *socs3* gene expression at various times after injury. Asterisks mark the injury sites (needle poke) and arrows point to MG-derived progenitors. White dot marks regions with autofluorescence. Error bars, s.d. Scale bar, 20  $\mu$ m (A, C, E, G). INL, inner nuclear layer.

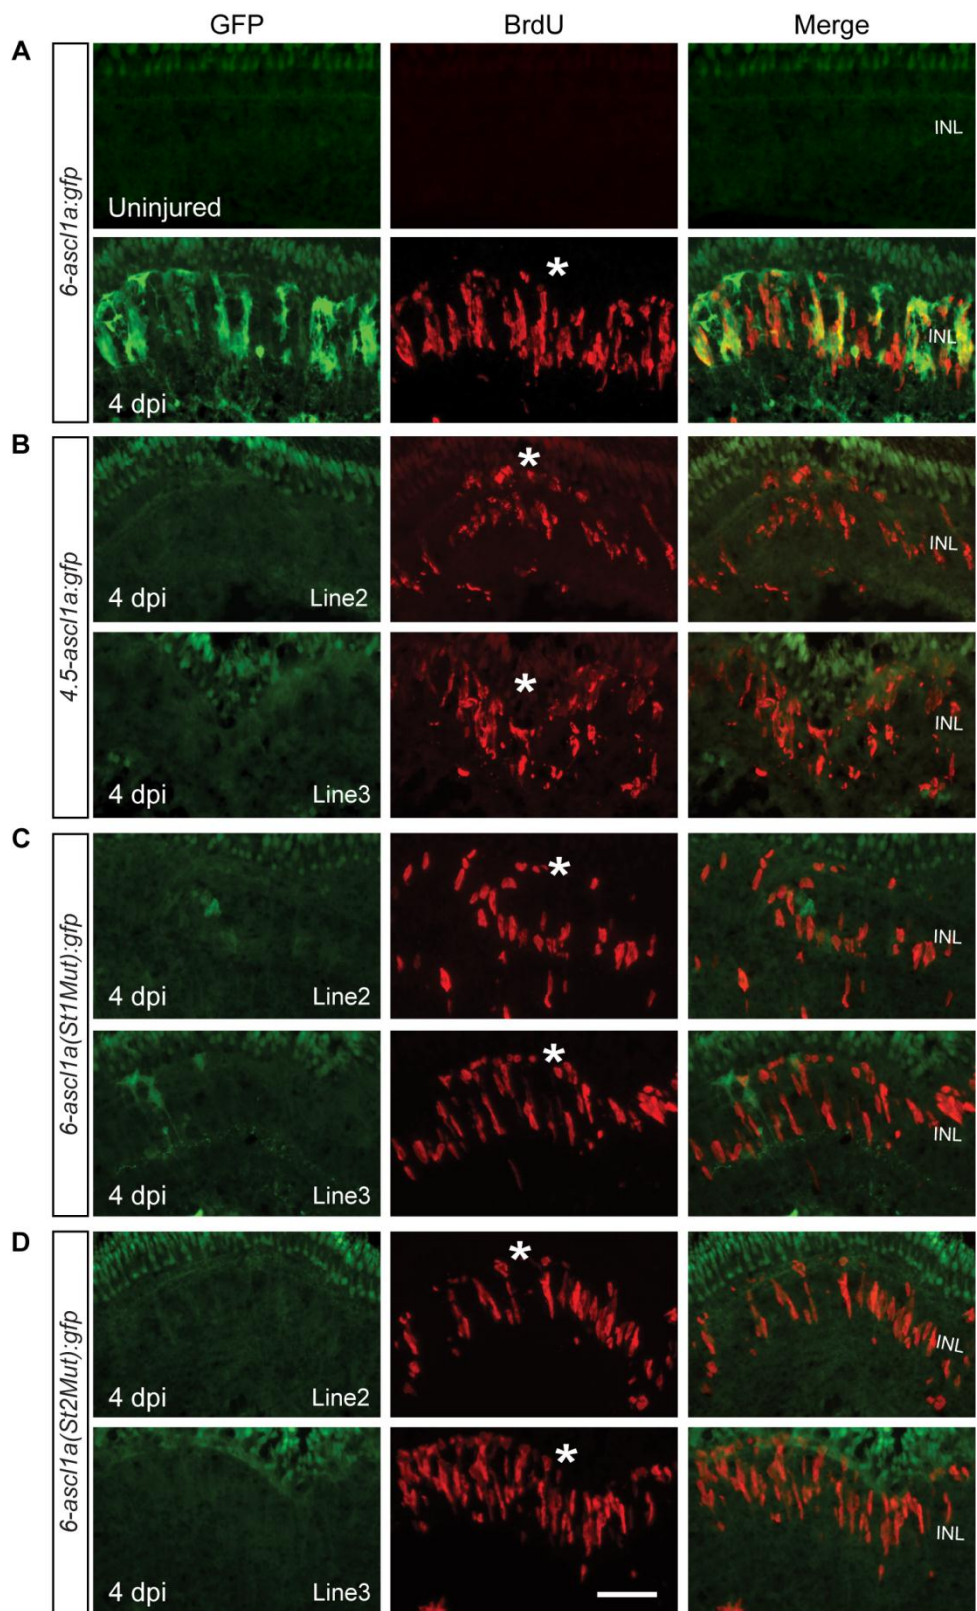

**Figure S4. Jak/Stat3 signaling mediates injury-dependent activation of the *ascl1a* promoter. Related to Figure 3.** (A) GFP and BrdU immunofluorescence co-localize beneath the injury site in *6-ascl1a:gfp* fish at 4 dpi. (B) A distal 1.5 kb *ascl1a* promoter fragment is necessary for injury-dependent transgene induction. (C, D) Consensus Stat3 sites located within this distal 1.5 kb region are necessary for injury-dependent transgene expression. BrdU<sup>+</sup> immunofluorescence identifies the injury site and a normal regenerative response. The asterisks mark the injury sites. See Figure 3 for promoter schematic. Scale bar, 50  $\mu$ m. INL, inner nuclear layer.



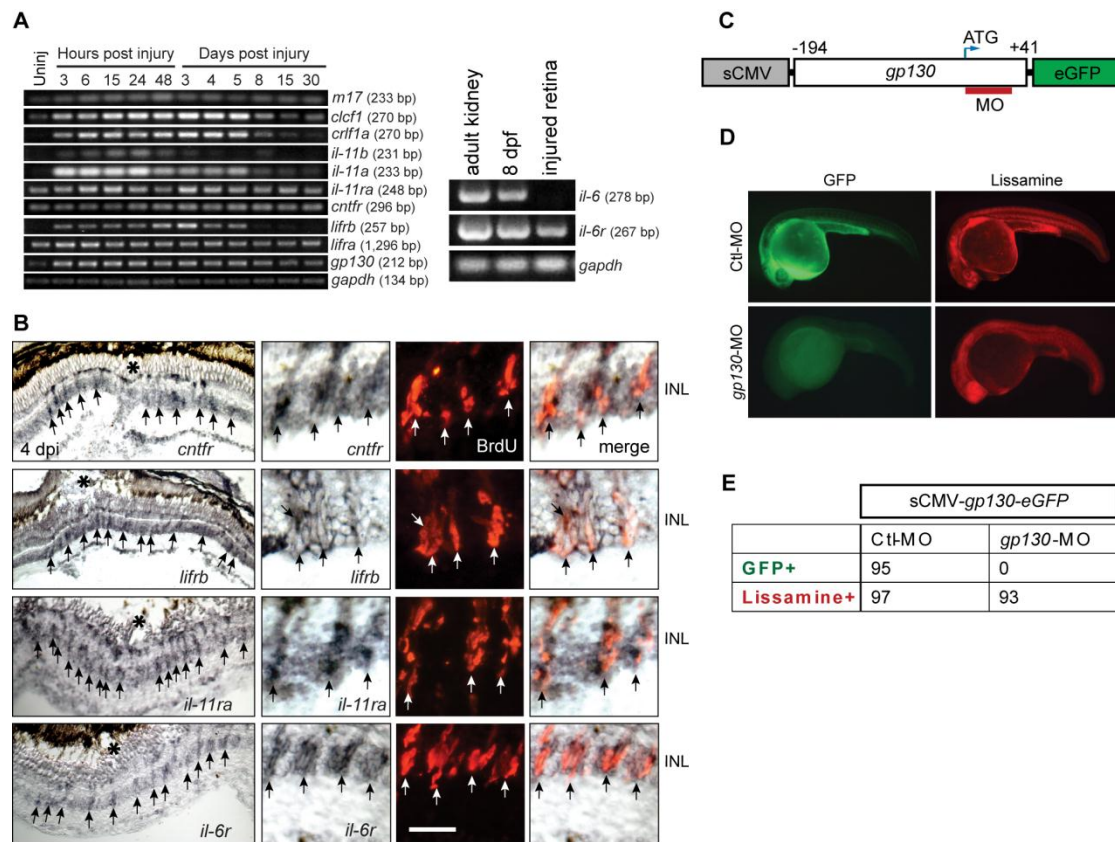

**Figure S5. Genes encoding IL-6 family cytokines are expressed in MG-derived progenitors upon retinal injury. Related to Figure 4.** (A) RT-PCR analysis of retinal gene expression at various times after injury. *il-6* is expressed in adult kidney and 8 dpf larva, but undetectable in the injured retina. (B) *In situ* hybridization shows induction of *il-6* family member genes in BrdU<sup>+</sup> MG-derived progenitors at the injury site. The asterisks mark the injury sites and the arrows point to MG-derived progenitors. Scale bars, 20  $\mu$ m. (C) Diagram of sCMV:*gp130-egfp* reporter in which a fragment of *gp130* DNA, containing the MO target sequence, is in-frame with the *egfp* coding sequence and under control of the sCMV promoter. (D) Injection of the sCMV:*gp130-egfp* reporter together with either lissamine-tagged control (Ctl) MO or *gp130*-targeting MO into one cell stage of zebrafish embryos and examined by fluorescence 24 hours later. Red fluorescence shows embryos received lissamine-tagged MOs. (E) Quantification of GFP-expressing embryos at 24 hpf. No GFP was detected in the *gp130*-targeting MO injected group, while GFP was readily detected in the control group. Similar results were obtained in 3 independent experiments. dpf, days post fertilization ; INL, inner nuclear layer.

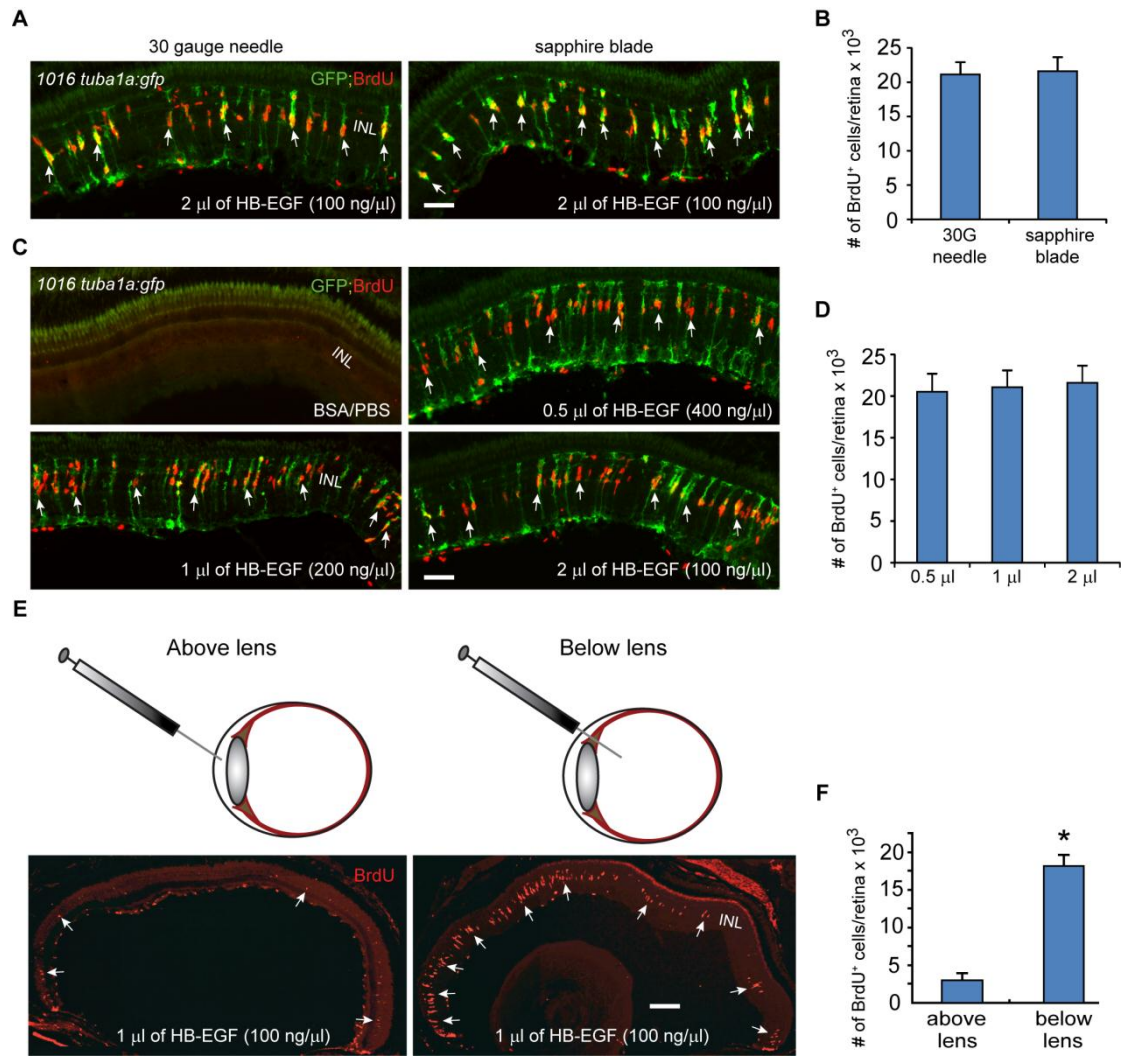

**Figure S6. HB-EGF stimulates MG reprogramming and proliferation in the uninjured retina. Related to Figure 4.** (A) A corneal puncture with a 30 gauge needle or a corneal incision made with a sapphire blade was followed by intravitreal injection of recombinant HB-EGF into the uninjured eye of *1016tuba1a:gfp* fish. HB-EGF stimulated GFP expression and BrdU incorporation in MG throughout the retina's inner nuclear layer. No GFP expression or BrdU incorporation is observed in PBS/BSA-injected eyes. (B) Quantification of BrdU<sup>+</sup> cells in (A) shows similar effect of intravitreally delivered HB-EGF on MG proliferation when the cornea was either punctured with a needle or cut with a sapphire blade; n=3 per group. (C) A sapphire blade was used to make a small incision in the cornea and 200 ng of HB-EGF in 0.5 to 2 µl volumes was intravitreally injected into uninjured eyes of *1016tuba1a:gfp* fish. (D) Quantification of BrdU<sup>+</sup> cells following intravitreal delivery of different HB-EGF volumes reveals a similar effect on MG proliferation regardless of injection volume; n=3 per group. (E, F) HB-EGF must be delivered below the lens to stimulate MG proliferation; \*P<0.05, n=3. Arrows point to MG-derived progenitor. Error bars, s.d. Scale bar, 50 µm (A, C); 150 µm (E). INL, inner nuclear layer.

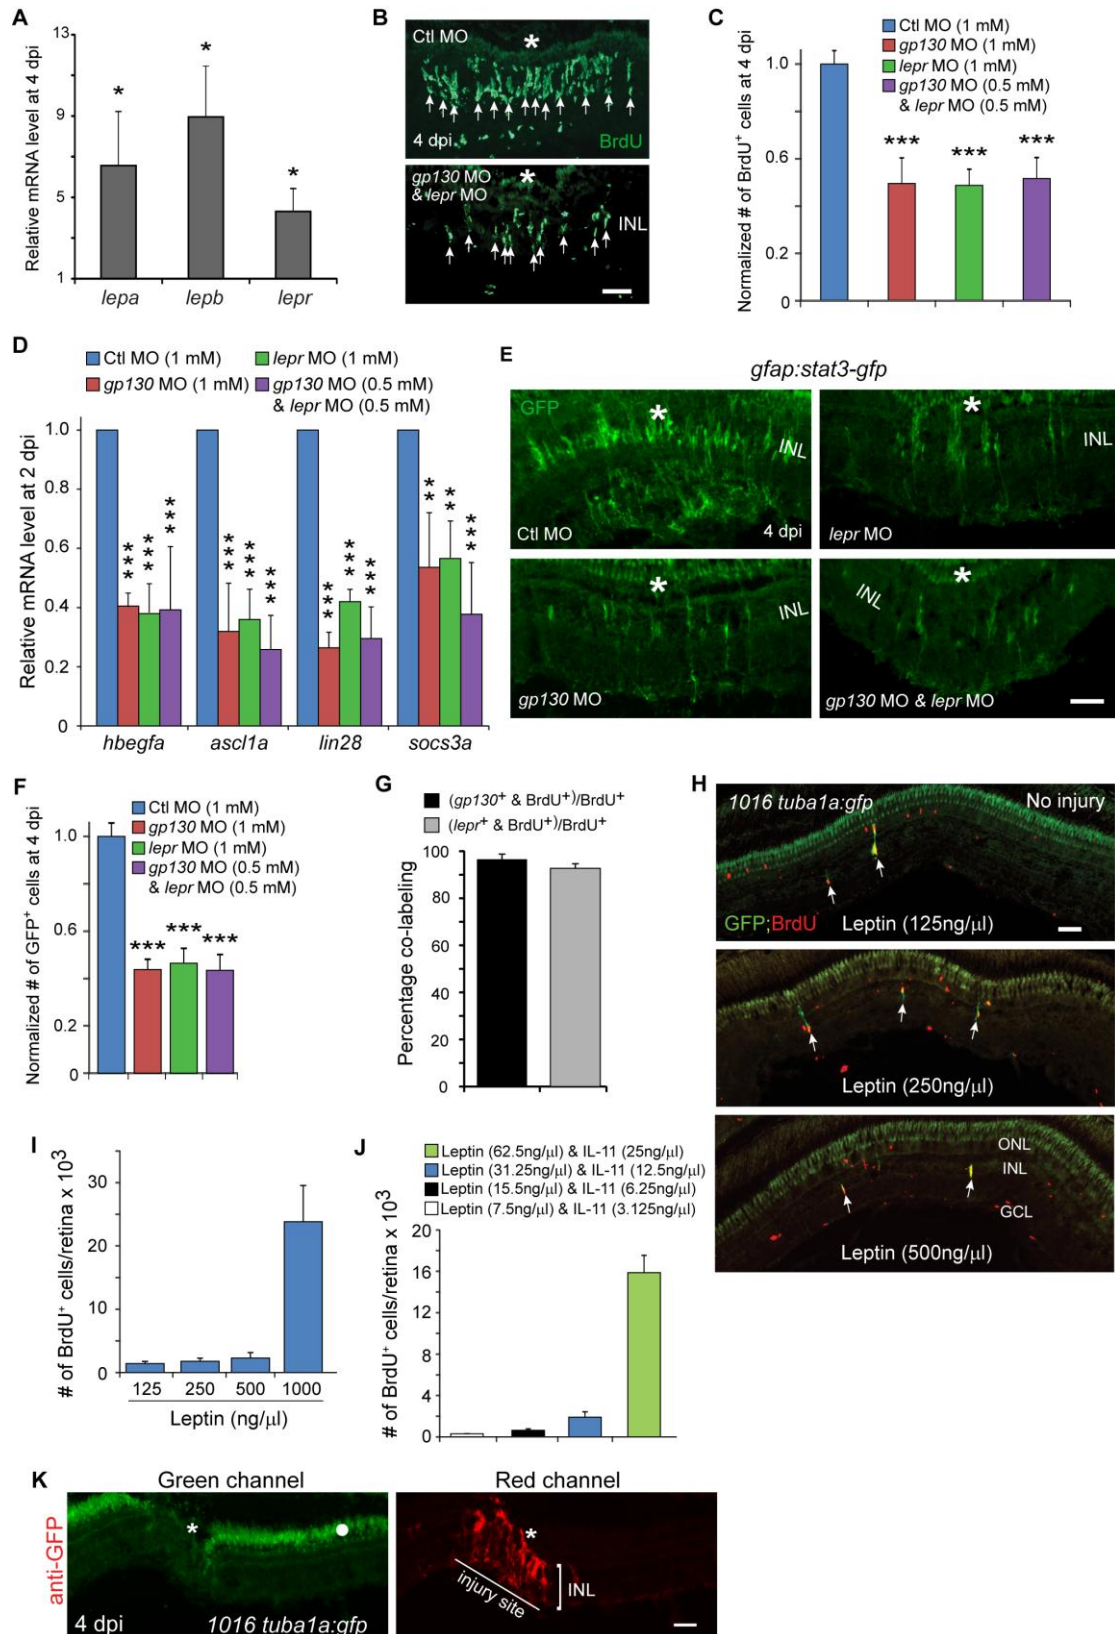

**Figure S7. Leptin signaling regulates the generation of MG-derived progenitors. Related to Figure 5.** (A) qPCR quantifying induction of gene expression in FACS purified GFP<sup>+</sup> MG-derived progenitors from the retina of *1016tuba1a:gfp* fish at 4 dpi in comparison

to that in FACS purified GFP<sup>+</sup> MG from the uninjured retina of *gfap:gfp* fish; \*P<0.05, n=3. (B) BrdU immunofluorescence shows that Leptin receptor and Gp130 knockdown inhibits the generation of BrdU<sup>+</sup> MG-derived progenitors at 4 dpi. Asterisks mark the injury sites and the arrows point to MG-derived progenitors. (C) Quantification of the effects Gp130 and Leptin receptor knockdown have on progenitor formation (Figure 4C; Figure 5C); \*\*\*P<0.001, n=4. (D) qPCR showing Gp130 and Leptin receptor knockdown, individually or in combination, inhibits injury-dependent induction of reprogramming genes at 2 dpi; \*\*P<0.01, \*\*\*P<0.001, n=4. (E) Knockdown of Gp130 inhibits the expression of Stat3-GFP at 4 dpi. (F) Quantification of the number of GFP<sup>+</sup> cells in the retina at 4 dpi following Gp130 or Leptin knockdown; \*\*\*P<0.001, n=4. Error bars, s.d. (G) Quantification of the number of BrdU<sup>+</sup> cells expressing *gp130* or *lepr* RNA in the retina at 4 dpi; n=3. Error bars, s.d. (H) Effects of different Leptin concentrations on the generation of BrdU<sup>+</sup> MG-derived progenitors and transgene expression in the uninjured retina of *1016tuba1a:gfp* fish. The arrows point to MG-derived progenitors. (I, J) Quantification of the effect different Leptin (I) or Leptin/IL-11 (J) concentrations have on progenitor formation in the uninjured retina; n=3. Error bars, s.d. (K) GFP immunofluorescence using a secondary antibody coupled to a red fluor shows autofluorescence in the green channel (left-hand panel, dot) that is localized to the ONL and pigment epithelium, while the red channel shows GFP expression restricted to the injury site (right-hand panel, asterisk). Scale bars, 20 μm (B); 50 μm (E, H, K). ONL, outer nuclear layer; INL, inner nuclear layer; GCL, ganglion cell layer.

**Table S1. Primer sequences for PCR. Related to Experimental Procedures.**

| Gene           | Sequence 5' - 3'                                                  |
|----------------|-------------------------------------------------------------------|
| <i>lepa</i>    | F, TTTCCAGCTCTCCGCTCAACC<br>R, CGGCGTATCTGGTCAACATGC              |
| <i>lepb</i>    | F, CATTGCTCGAACCACCATCAGC<br>R, TCTTTATGCACCGGGGTCTCG             |
| <i>lepr</i>    | F, CAGTACGAGCTGCAATTCAAGG<br>R, TAAAATGCGCCAGAAGTCTGG             |
| <i>m17</i>     | F, CTTGATTGCCGTTCAAGTTAGTGC<br>R, TTAAGATGCGCTCCGATTCAAGT         |
| <i>clcf1</i>   | F, GAAAGTTGGTCAGGTTGCTGTGC<br>R, CATAAGTCCACACGTGTTGCTGC          |
| <i>crlf1a</i>  | F, GGGATTCTGGGATCTAGGAAAGC<br>R, TCCTTGAAGAACCTGGTTGCG            |
| <i>il-11a</i>  | F, CTCCTCATCGCTGCTTCTCTCG<br>R, TTGCGAAGTCACTGGCTCTGC             |
| <i>il-11b</i>  | F, GCTAACAGTGTGCGCTGACTCC<br>R, CTGTAGTTCAGTGAGGGCAGGG            |
| <i>il-11ra</i> | F, GTTGGACTGTTGGTTTTGTTGG<br>R, TGGATTGTGGGTAATGAAGGC             |
| <i>cntfr</i>   | F, ACACCATCACCGACGCCTATGC<br>R, GAAGCTCACACATCACATGATGG           |
| <i>lifra</i>   | F, AAGCCGTCTCCACACAGTCTGG<br>R, TTCCCCCATTCTGCTTTCC               |
| <i>lifrb</i>   | F, TCACAGTTGACCAGATGCTTGC<br>R, ATGTGGGTTTTCTGAGGTGGG             |
| <i>gp130</i>   | F, AATGAAGTTCGCCGATGGAGAGG<br>R, CGTCTTCCTTGGGCATTTCCG            |
| <i>il-6</i>    | F, GCTATTCCTGTCTGCTACACTGG<br>R, TGAGGAGAGGAGTGCTGATCC            |
| <i>il-6r</i>   | F, TCAGCTCCTGAGACAACACTGC<br>R, AAACGGCATAGTCTGTTTCCC             |
| <i>stat3</i>   | F, ACACATTAAGGGGTCAACATGGCCCAG<br>R, GCATTTCCGGCAGGTGTCCATATCCGAG |
| <i>socs3a</i>  | F, CACTAACTTCTCTAAAGCAGGG<br>R, GGTCTTGAAGTGGTAAAACG              |
| <i>socs3b</i>  | F, GAAAACCTCCAAGATTGAGTCG<br>R, TACTATGCGTTACCATGGCG              |
| <i>hbegfa</i>  | F, ATGTCTGACCATCATTTGGCCTCC<br>R, ACCATTCAGCTTGCTGTGCC            |
| <i>ascl1a</i>  | F, ATCCGCGCGCTGCAGCAGCTTCTGGACG                                   |

|              |                                                                        |
|--------------|------------------------------------------------------------------------|
|              | R, CGAGTGCTGATATTTTTAAGTTTCCTTTTAC                                     |
| <i>lin28</i> | F, TAACGTGCGGATGGGCTTCGGATTTCTGTC<br>R, ATTGGGTCCTCCACAGTTGAAGCATCGATC |
| <i>gfp</i>   | F, CAGCAGAACACCCCATC<br>R, CTCGTCCATGCCGAGAGT                          |
| <i>gfap</i>  | F, GGATGAGATCCAGATGCTGAAGG<br>R, CAGATCCTTCCTCTCCGTAGTGG               |
| <i>gapdh</i> | F, ATGACCCCTCCAGCATGA<br>R, GGCGGTGTAGGCATGAAC                         |

**Table S2. Kd, ED<sub>50</sub> and intravitreal concentration of recombinant mammalian cytokines. Related to Experimental Procedures.**

| <b>Cytokine</b>          | <b>Kd and ED<sub>50</sub></b>                                                                                                                                                                                                                                     | <b>Estimated concentration after intravitreal injection*</b> |
|--------------------------|-------------------------------------------------------------------------------------------------------------------------------------------------------------------------------------------------------------------------------------------------------------------|--------------------------------------------------------------|
| Recombinant human Leptin | Kd ~0.06-3nM (Verkerke et al., PLoS One 9:e94843, 2014; Uotani et al., Diabetes 48:279, 1999). ED <sub>50</sub> ~0.4-2 ng/ml in a cell proliferation assay ( <a href="http://www.rndsystems.com/Products/398-LP">http://www.rndsystems.com/Products/398-LP</a> ). | 62.5 ng = 0.195 μM<br>1 μg = 3.125 μM                        |
| Recombinant rat CNTF     | Two classes of receptor binding sites: high affinity site, Kd ~1pM and low affinity site Kd ~1nM (Wong et al., J Biol Chem 270:313, 1995). ED <sub>50</sub> ~1 ng/ml in a cell proliferation assay (Gearing et al, Proc Natl Acad Sci USA 91:1119, 1994).         | 25 ng = 54.8 nM<br>100 ng = 219 nM                           |
| Recombinant human IL-6   | Two classes of receptor binding sites: high affinity site, Kd ~10pM and low affinity site, Kd ~1nM (Yamsaki et al., Science 241:825, 1988). ED <sub>50</sub> ~10 ng/ml in a cell proliferation assay (Hibi et al., 63:1149, 1990).                                | 100 ng = 211 nM                                              |
| Recombinant mouse IL-11  | Two classes of receptor binding sites: high affinity site, Kd ~0.3-0.8nM and low affinity site, Kd ~10nM; ED <sub>50</sub> ~5 ng/ml in a cell proliferation assay (Hilton et al., EMBO J. 13:4765, 1994).                                                         | 25 ng = 65.3 nM<br>100 ng = 2.6 μM                           |

\*Cytokine concentrations in the vitreous of injected eyes was estimated as previously described using a 20 μl vitreal volume (Fimbel et al., J Neurosci 27:1712, 2007; Ritchey et al., Exp Eye Res 99:1, 2012; Raymond et al., J Neurobiol 19:431, 1988).
